# Supplementary material
Source: PubMed Central journal article supplement (PMC4497978)
Supplement: NIHMS62385-supplement-4.pdf [file NIHMS62385-supplement-4.pdf]

**Supplementary Table 3:** Putative T4SS effectors in *A. lacustris* and best BLAST hits in the SecReT4 (experimentally verified) effectors database

| Accession no. | log E-value Hit                            | Organism                                                      | Feature               |
|---------------|--------------------------------------------|---------------------------------------------------------------|-----------------------|
| SZ25_00202    | -12 ankyrin repeat protein                 | Coxiella burnetti CbuK_Q154                                   | Effector <sup>1</sup> |
| SZ25_00259    | -6 ankyrin repeat protein                  | Legionella pneumophila 2300/99 Alcoy                          | Effector <sup>1</sup> |
| SZ25_00269    | -6 hypothetical protein lpl1955            | Legionella pneumophila str. Lens                              | Effector              |
| SZ25_00250    | -43 phosphoglucomutase                     | Coxiella burnetti Dugway 5J108-111                            | Effector              |
| SZ25_00281    | -6 unnamed protein product                 | Ochrobactrum anthropi ATCC 49188                              | Effector <sup>1</sup> |
| SZ25_00283    | -6 legS2 gene product                      | Legionella pneumophila subsp. Pneumophila str. Philadelphia 1 | Effector <sup>1</sup> |
| SZ25_00294    | -102 phosphoglucomutase                    | Coxiella burnetti Dugway 5J108-111                            | Effector              |
| SZ25_00363    | -36 unnamed protein product                | Ochrobactrum anthropi ATCC 49188                              | Effector <sup>1</sup> |
| SZ25_00426    | -6 unnamed protein product                 | Ochrobactrum anthropi ATCC 49188                              | Effector <sup>1</sup> |
| SZ25_00428    | -6 legS2 gene product                      | Legionella pneumophila subsp. Pneumophila str. Philadelphia 1 | Effector <sup>1</sup> |
| SZ25_00450    | -15 Fic family protein                     | Coxiella burnetti CbuK_Q154                                   | Effector <sup>1</sup> |
| SZ25_00544    | -8 ankyrin repeat protein                  | Coxiella burnetti Dugway 5J108-111                            | Effector <sup>1</sup> |
| SZ25_00548    | -8 unnamed protein product                 | Brucella suis 1330                                            | Effector <sup>1</sup> |
| SZ25_00629    | -26 hypothetical protein lpp1946           | Legionella pneumophila str. Paris                             | Effector <sup>1</sup> |
| SZ25_00699    | -21 hypothetical protein pRi1724_p056      | Agrobacterium rhizogenes                                      | Effector <sup>1</sup> |
| SZ25_00773    | -6 Ankyrin repeat protein                  | Legionella pneumophila 2300/99 Alcoy                          | Effector <sup>1</sup> |
| SZ25_00779    | -8 surface antigen                         | Coxiella burnetti RSA 331                                     | Effector <sup>1</sup> |
| SZ25_00862    | -31 hypothetical protein COXBURSA331_A2207 | Coxiella burnetti RSA 331                                     | Effector <sup>1</sup> |

<sup>1</sup> Experimentally verified effector database
